# Supplementary material for: Structural Disorder Provides Increased Adaptability for Vesicle Trafficking Pathways
Source: PLoS Comput Biol. 2013 Jul 18;9(7):e1003144. doi: 10.1371/journal.pcbi.1003144 (PMC3715437; doi:10.1371/journal.pcbi.1003144)
Supplement: Table S4 — Tissue-specific exons (TSEs) in budding- and fission-associated human proteins have been collected from Wang et al. [65] . The resulting 44 coding exons are mapped onto Ensembl transcripts, and their various disorder parameters are given. (XLS) [file pcbi.1003144.s004.xls]

## Sheet: Munka1
Gene Name	Location in human genome (hg18)	Exon Switch Score	Route	ENSEMBL Transcript	ENSEMBL Protein	TS exon location in protein	Number of residues in TSE	% disordered residues in TSE	More disordered than whole proteome reference (22.81%)? Yes/No	ANCHOR DBR locations
AP1B1	chr22 :28065743-28065763:-	1	CLTR	ENST00000405198	ENSP00000384194	667-674	8	0.75	Yes	N/A (649-666)
BIN1	chr2:127534642-127534686:-	1	CLTR	ENST00000259238	ENSP00000259238	255-269	15	1	Yes	246-270
PICALM	chr11 :85378941-85379090:-	0.92	CLTR	ENST00000341783	ENSP00000342095	420-469	50	0.18	No	N/A
CLTB	chr5:175756086-175756139:-	0.9	CLTR	ENST00000310418	ENSP00000309415	156-174	19	0.1579	No	155-177
AP1S2	chrX:15768541-15768635:-	0.8	CLTR	ENST00000340245	ENSP00000340912	140-153	14	0	No	N/A
ERGIC3	chr20:33605557-33605571:+	0.8	COPII	ENST00000279052	ENSP00000279052	229-234	6	0	No	N/A
CLTA	chr9:36200622-36200657:+	0.77	CLTR	ENST00000242285	ENSP00000242285	180-192	13	0	No	168-187
SH3GLB2	chr9:130811553-130811567:-	0.75	CLTR	ENST00000372554	ENSP00000361634	284-289	6	0	No	N/A
ARRB1	chr11:74660393-74660416:-	0.75	CLTR	ENST00000420843	ENSP00000409581	333-341	9	0	No	N/A (342-352)
TMED2	chr12:122638111-122638131:+	0.74	COPI/ COPII	ENST00000438031	ENSP00000405845	125-132	8	1	Yes	N/A
BIN1	chr2:127542209-127542301:-	0.74	CLTR	ENST00000351659	ENSP00000315388	174-204	31	0	No	N/A
EPN1	chr19:60892475-60892549:+	0.73	CLTR	ENST00000270460	ENSP00000270460	202-226	25	1	Yes	204-223
AP2M1	chr3:185381127-185381132:+	0.7	CLTR	ENST00000292807	ENSP00000292807	142-143	2	0.5	Yes	N/A
SH3GLB2	chr9:130815108-130815119:-	0.69	CLTR	ENST00000359638	ENSP00000352659	188-191	4	0.5	Yes	N/A
BIN1	chr2:127526301-127526408:-	0.69	CLTR	ENST00000393041	ENSP00000376761	305-340	36	1	Yes	306-385
ARRB2	chr17:4565031-4565087:+	0.64	CLTR	ENST00000381488	ENSP00000370898	8-18	11	0	No	N/A
GGA1	chr22:36350834-36351029:+	0.62	CLTR	ENST00000343632	ENSP00000341344	278-313	36	0.4444	Yes	279-299 (314-337)
ARRB2	chr17:4565057-4565087:+	0.59	CLTR	ENST00000269260	ENSP00000269260	8-18	11	0	No	N/A
SH3KBP1	chrX:19473961-19474089:-	0.57	CLTR	ENST00000379716	ENSP00000369039	261-303	43	1	Yes	256-271, 280-357
BIN1	chr2:127525200-127525289:-	0.57	CLTR	ENST00000409400	ENSP00000386797	304-333	30	1	Yes	273-350
SAR1A	chr10:71591381-71591500:-	0.54	COPII	ENST00000373239	ENSP00000362336	20-59	40	0	No	N/A
GGA1	chr22:36350922-36351029:+	0.5	CLTR	ENST00000343632	ENSP00000341344	278-313	36	0.4444	Yes	279-299
EPS15L1	chr19:16333590-16333795:-	0.5	CLTR	ENST00000248070	ENSP00000248070	794-862	69	0.942	Yes	797-845, 853-864
SAR1A	chr10:71591381-71591693:-	0.49	COPII	ENST00000373239	ENSP00000362336	1-59	59	0	No	N/A
AX747833 (NUMB hom.)	chr14:72815742-72815885:-	0.46	CLTR	ENST00000359560	ENSP00000352563	355-402	48	0.8333	Yes	358-380, 391-422
EPN1	chr19:60880224-60880396:+	0.46	CLTR	ENST00000411543	ENSP00000406209	1-16	16	0	No	N/A
AP1B1	chr22:28055701-28055709:-	0.43	CLTR	ENST00000357586	ENSP00000350199	923-925	3	0	No	N/A
ARFGAP3	chr22:41536763-41536894:-	0.42	COPI	ENST00000263245	ENSP00000263245	355-399	45	0.3333	Yes	350-358
EPN3	chr17:45971244-45971324:+	0.37	CLTR	ENST00000268933	ENSP00000268933	228-254	27	0.9259	Yes	236-250
DAB2	chr5:39418477-39419130:-	0.36	CLTR	ENST00000320816	ENSP00000313391	230-446	217	0.9908	Yes	232-243, 253-267, 270-290, 309-316, 330-355, 358-378, 384-434, 446-464
DNM1	chr9:130055201-130055237:+	0.36	CLTR	ENST00000341179	ENSP00000345680	875-881	7	1	Yes	867-881
SEC31B	chr10:102239755-102240069:-	0.35	COPII	ENST00000370345	ENSP00000359370	884-988	105	0.9905	Yes	857-924, 933-947, 961-985
COPZ2	chr17:43464521-43464598:-	0.35	COPI	ENST00000006101	ENSP00000006101	137-163	27	0	No	N/A
SEC31A	chr4:83982317-83982658:-	0.32	COPII	ENST00000348405	ENSP00000337602	837-950	114	1	Yes	840-857, 867-894, 909-1063
CLTC	chr17:55119144-55119164:+	0.31	CLTR	ENST00000472651	ENSP00000465200	158-165	8	0	No	N/A
YIF1A	chr11:65809428-65809583:-	0.3	COPII	ENST00000376904	ENSP00000366102	162-214	53	0	No	N/A
SEC31A	chr4:83982362-83982658:-	0.3	COPII	ENST00000348405	ENSP00000337602	837-936	100	1	Yes	840-857, 867-894, 909-1063
SNAP91	chr6:84358893-84358976:-	0.29	CLTR	ENST00000369694	ENSP00000358708	611-639	29	0.3793	Yes	604-615, 631-642
SYNJ2	chr6:158369776-158370046:+	0.29	CLTR	ENST00000367121	ENSP00000356088	72-162	91	0.011	No	N/A
COPZ1	chr12:53020514-53020666:+	0.28	COPI	ENST00000262061	ENSP00000262061	7-29	23	0	No	N/A
NECAP2	chr1:16654900-16654975:+	0.27	CLTR	ENST00000406746	ENSP00000383925	223-248	26	1	Yes	198-229, 233-248
PICALM	chr11:85366761-85366784:-	0.27	CLTR	ENST00000349405	ENSP00000263366	544-550	7	0	No	N/A
DAB2	chr5:39424164-39424226:-	0.26	CLTR	ENST00000339788	ENSP00000345508	209-229	21	1	Yes	210-219 (231-246)
AP2M1	chr3:185381127-185381223:+	0.25	CLTR	ENST00000292807	ENSP00000292807	142-143	2	0.5	Yes	N/A
